# Supplementary material for: Dynamic environment but no temperature change since the late Paleogene at Lühe Basin (Yunnan, China)
Source: Copernicus journal article supplement (doi:10.5194/egusphere-2023-373), 2023-03-27
Supplement: Supplementary file 1 [file egusphere-2023-373-supplement.zip]

## Sheet: Table S1
Table S1. All biomarker data from Lühe basin. The grey columns include sample information, including the section name, sample code, depth from base (m), and lithology recorded from the original log. The lavender columns include bulk information, including average organic carbon percentage (OC%), total nitrogen percentage (TN%), carbon to nitrogen ratios (C/N ratio), and the stable carbon isotopic…
Sample Info				Total organic carbon (TOC) %				Polar fractions (GDGTs)							Apolar fractions (hopanes, n-alkanes, and terpenoids)
SAMPLE Info				Average				Environmental conditions				MAAT calibrations			Maturity			Depositional environment
Section	Sample code	Depth from base	Lithology (from log)	OC (%)	TN (%)	C/N ratio	δ¹³C (VPDB)	mbt5me	BIT index (Hopmans 2004)	CBTpeat (Naafs et al., 2017)	pH (CBTpeat)	MAATpeat (Naafs 2017)	MAATsoil (Naafs et al., 2017)	MAFlake (Martinez-Sosa et al., 2022)	C31 ββ/(αβ+βα+ββ)	C29 ββ/(αβ+βα+ββ)	CPI	ACL	pAq	C23/(C23+C31)
Lvhe/Yunnan	Lv-340	340	0	55.6567	1.22941	45.407	-23.5184	0.736807	0.998577	-0.813983	6.04318	15.3966	14.2297	22.0602
Lvhe/Yunnan	Lv-331.5	331.5	coal	1.43249	0.0742522	19.5131	-25.6983	0.570016	0.979497	-0.609627	6.55203	6.69344	7.55635	16.5005	0.678268		6.51135	29.0262	0.188208	0.227801
Lvhe/Yunnan	Lv-325.5	325.5	clay/coal?	8.03659	0.414894	19.5625	-26.5468	0.428645	0.983518	-0.800633	6.07642	-0.683305	1.90009	11.7882	0.528899	0.664021	5.11947	29.0777	0.317014	0.386328
Lvhe/Yunnan	Lv-314	314	coal	7.78701	0.208914	37.8826	-22.8578	0.740891	0.990526	-1.44619	4.46899	15.6097	14.3931	22.1964
Lvhe/Yunnan	Lv-311	311	silty mudstone	1.2863	0.0786927	16.3604	-25.6893	0.54149	0.997291	-0.153769	7.68711	5.20496	6.41502	15.5497	0.626294	0.596482	5.79671	29.0368	0.314445	0.494989
Lvhe/Yunnan	Lv-305	305	0	40.7605	0.905901	45.0138	-22.7001
Lvhe/Yunnan	Lv-303.5	303.5	coal	60.2249	1.48264	40.8582	-22.4966	0.734219	1	-2.04682	2.97343	15.2615	14.1261	21.974
Lvhe/Yunnan	Lv-301.9	301.9	silty mudstone	5.97042	0.224527	26.7379	-25.4477	0.497868	0.993563	-0.694414	6.34091	2.92875	4.66969	14.0956	0.506523	0.424176	7.09526	28.8505	0.247237	0.360551
Lvhe/Yunnan	Lv-289	289	silty mudstone	3.32454	0.114106	29.106	-25.4915								0.469954	0.589229	9.44857	29.2203	0.102644	0.104311
Lvhe/Yunnan	Lv-273.5	273.5	silty mudstone	0.209052	0.0383732	5.50231	-24.7852	0.688223	0.973402	-0.195645	7.58284	12.8615	12.2858	20.4408	0.649546	0.853504	3.28073	28.901	0.418803	0.437357
Lvhe/Yunnan	Lv-268	268	silty mudstone	3.15144	0.0755379	43.0132	-23.912	0.499038	0.976998	-0.688165	6.35647	2.9898	4.71651	14.1346	0.547256	0.597769	4.80646	28.8817	0.31367	0.348561
Lvhe/Yunnan	Lv-255	255	clay?	0.887775	0.117941	7.57739	-23.5235	0.588804	0.988255	-0.992687	5.59821	7.67381	8.30806	17.1268	0.38243		5.1768	28.8737	0.318058	0.406674
Lvhe/Yunnan	Lv-253.8	253.8	silty mudstone	0.184957	0.0346733	5.43817	-22.5055	0.645197	0.987461	-0.742113	6.22214	10.6164	10.5643	19.0066	0.650716	0.697714	4.10647	28.7925	0.387908	0.506373
Lvhe/Yunnan	Lv-228.5	228.5	coal	3.54434	0.196522	18.0703	-25.1752	0.57528	0.979486	-1.18559	5.11787	6.9681	7.76695	16.676	0.531868	0.639912	4.83239	28.8286	0.33043	0.376108
Lvhe/Yunnan	Lv-224.1	224.1	coal/ash layer?	42.8683	1.51775	28.2904	-24.5627	0.630784	0.992024	-1.36652	4.66737	9.86431	9.98767	18.5261	0.145647	0.228633	8.4127	29.316	0.192712	0.199052
Lvhe/Yunnan	Lv-202	202	0	1.66741	0.0778762	21.4084	-26.2825								0.509653	0.598219	4.75173	29.092	0.23142	0.230175
Lvhe/Yunnan	Lv-201	201	coal	0.208315	0.0483872	4.31041	-26.8303	0.548992	0.992329	-0.851595	5.94953	5.5964	6.71517	15.7997	0.283382	0.52806	5.67312	28.7677	0.220029	0.27071
Lvhe/Yunnan	Lv-183.5	183.5	coal?	0.137683	0.081649	1.75218	-23.6772	0.596945	0.997078	-0.847238	5.96038	8.09861	8.63379	17.3982			8.55859	29.2185	0.0657998	0
Lvhe/Yunnan	Lv-149	149	coal	0.663108	0.0589364	11.3434	-24.4355	0.583095	0.982497	-1.05519	5.44257	7.3759	8.07964	16.9365	0.332824	0.292338	7.79892	29.2606	0.198948	0.162348
Lvhe/Yunnan	Lv-146.7	146.7	coal	2.60583	0.0811668	32.5347	-23.8286	0.57798	0.995209	-1.18196	5.12691	7.10897	7.87496	16.766
Lvhe/Yunnan	Lv-134.5	134.5	coal	0.646028	0.105472	6.29423	-26.9525	0.525342	0.991668	-0.961753	5.67524	4.36236	5.76894	15.0114	0.418498		4.41647	28.8782	0.291481	0.439843
Lvhe/Yunnan	Lv-129	129	coal	4.75926	0.14964	31.973	-25.9993	0.50143	0.956762	-0.778187	6.13231	3.1146	4.8122	14.2143			10.0923	29.3404	0.0297394	0.0320827
Lvhe/Yunnan	Lv-115	115	coal?	1.33195	0.105725	12.5615	-25.549	0.536842	0.981569	-1.20437	5.07111	4.96239	6.22903	15.3947			7.52957	29.0133	0.0910571	0.0993451
Lvhe/Yunnan	Lv-105.6	105.6	silty sandstone	0.847215	0.0731937	11.6511	-26.0559								0.468385	0.662258	5.5598	29.1192	0.176048	0.185174
Lvhe/Yunnan	Lv-100.5	100.5	coal	0.321419	0.0746912	4.47198	-25.9696	0.715816	0.988755	-1.14926	5.20834	14.3013	13.3898	21.3605			6.20178	29.0842	0.14346	0.26344
Lvhe/Yunnan	Lv-96	96	coal	2.80237	0.0919471	31.725	-25.4799	0.671341	0.978553	-0.907367	5.81066	11.9806	11.6104	19.878			7.619	29.0527	0.112799	0.160332
Lvhe/Yunnan	Lv-83	83	silty mudstone	3.78186	0.163673	23.0612	-26.2784	0.514253	0.979406	-0.982062	5.62466	3.78372	5.32526	14.6418	0.581095	0.638628	4.44585	28.8953	0.390484	0.485765
Lvhe/Yunnan	Lv-73	73	silty mudstone	3.6524	0.141381	26.6097	-25.9548	0.591176	0.971128	-0.884868	5.86668	7.79757	8.40296	17.2059	0.590349	0.712092	7.4792	29.2193	0.169863	0.19885
Lvhe/Yunnan	Lv-65	65	clay?	7.7049	0.2709	28.5135	-25.5333								0.565736	0.560721	4.17801	28.9811	0.344553	0.52857
Lvhe/Yunnan	Lv-61	61	coal	8.62449	0.285644	30.6868	-24.1754								0.613006		5.6093	28.8338	0.424022	0.644088
Lvhe/Yunnan	Lv-58.5	58.5	coal	1.32609	0.0847642	16.1174	-24.0732								0.567009		3.13064	28.0579	0.750395	1
Lvhe/Yunnan	Lv-57.6	57.6	coal	3.11737	0.142936	22.095	-24.8775	0.67611	0.981397	-0.924669	5.76757	12.2294	11.8012	20.037	0.373596		3.47424	28.9311	0.595182	0.663402
Lvhe/Yunnan	Lv-53.2	53.2	coal	10.0736	0.347905	29.0061	-26.3679								0.368541	0.637642	5.19686	29.1665	0.276155	0.35462
Lvhe/Yunnan	Lv-50.5	50.5	silty sandstone	1.62368	0.0779053	21.1164	-25.3491	0.526431	0.962467	-0.947365	5.71106	4.41916	5.81249	15.0477	0.491984	0.636586	5.80161	29.0584	0.238558	0.281797
Lvhe/Yunnan	Lv-47.3	47.3	sand/silty mudstone	23.3008	0.634251	36.7156	-25.9377								0.100465		4.04877	29.1817	0.454008	0.492934
Lvhe/Yunnan	Lv-46.5	46.5	silty mudstone	6.60082	0.258387	25.6324	-26.3146								0.49998	0.693129	5.15895	28.9066	0.360235	0.51934
Lvhe/Yunnan	Lv-44.1	44.1	sand	0.296784	0.0675935	4.53511	-23.4157	0.725198	1	-1.46157	4.43069	14.7908	13.7652	21.6733			5.60639	28.9227	0.216261	0.295768
Lvhe/Yunnan	Lv-40.7	40.7	0	1.7368	0.0728841	23.8371	-26.2841	0.475825	0.960599	-0.917572	5.78525	1.77854	3.78775	13.3608	0.489251	0.334453	5.84722	29.1534	0.235501	0.335788
Lvhe/Yunnan	Lv-31.7	31.7	silty mudstone	13.2314	0.252151	52.8905	-25.8633	0.643373	0.98414	-1.32963	4.75923	10.5212	10.4914	18.9458		0.291342	2.01994	29.0594	0.46228	0.520797
Lvhe/Yunnan	Lv-26.7	26.7	coal	1.44716	0.0831079	17.4084	-23.8272	0.697861	0.988827	-1.72178	3.78278	13.3644	12.6714	20.762			11.2859	27.704	0.895265	0.883146
Lvhe/Yunnan	Lv-23.8	23.8	coal	58.9358	1.32065	44.629	-24.6836									0.316109	3.89938	29.3097	0.384112	0.361563
Lvhe/Yunnan	Lv-22.4	22.4	coal	55.6722	1.0571	52.738	-23.5866										7.55568	29.6644	0.328753	0.403933
Lvhe/Yunnan	Lv-21.4	21.4	coal	22.3672	0.436628	51.2519	-24.3855									0.307688	4.63988	29.2824	0.352583	0.482377
Lvhe/Yunnan	Lv-18.9	18.9	0	55.8639	0.963131	58.2551	-24.3471	0.545166	0.985676	-1.27311	4.89997	5.39675	6.56208	15.6722	0.0560703		5.2532	29.3116	0.179478	0.314009
Lvhe/Yunnan	Lv-18.10	18.1	0
Lvhe/Yunnan	Lv-17.9	17.9	coal	2.61001	0.0990452	26.3721	-25.8819								0.404603		3.577	29.1387	0.335008	0.530273
Lvhe/Yunnan	Lv-15.9	15.9	silty mudstone	2.1386	0.0743419	29.0316	-25.0664								0.264182		6.03311	29.0491	0.120967	0.148042
Lvhe/Yunnan	Lv-15	15	0	0.568642	0.0373505	15.6856	-24.5413										3.4443	28.667	0.476361	0.565357
Lvhe/Yunnan	Lv-14.2	14.2	silty mudstone	0.290496	0.0284734	10.3192	-25.5599										3.80937	29.1363	0.0968659	0
Lvhe/Yunnan	Lv-13.3	13.3	silty mudstone	0.55157	0.0294072	19.8438	-24.9418										3.95128	28.7547	0.351323	0.418743
Lvhe/Yunnan	Lv-11.9	11.9	coal/sandy siltstone	0.361258	0.0306519	12.1517	-24.9742										3.3917	29.0249	0.310172	0.352503
Lvhe/Yunnan	Lv-11.7	11.7	coal	2.61092	0.0834028	31.3452	-24.7781	0.487974	0.900959	-1.22396	5.02234	2.41247	4.27383	13.7658			6.05837	29.5989	0.375979	0.242176
Lvhe/Yunnan	Lv-8.2	8.2	coal	63.8815	1.09193	58.5898	-23.9673	0.606326	0.997581	-1.33846	4.73724	8.58808	9.0091	17.7109	0.0467689		7.75171	29.0047	0.438852	0.493636
Lvhe/Yunnan	Lv-6.7	6.7	sand	41.7441	0.790368	52.9309	-25.6139	0.42718	0.978648	-1.17674	5.13991						4.6298	28.4843	0.50505	0.575976
Lvhe/Yunnan	Lv-6.5	6.5	sand	0.252934	0.00495808	56.5163	-24.522	0									5.41082	28.4377	0.277408	0.281139
lignite, reliable br GDGT calibration

## Sheet: Table S2
Table S2. Terpenoid data for vegetation change at Lühe basin. The grey columns include sample information, including the section name, sample code, depth from base (m), and lithology recorded from the original log. The green columns track seven diterpenoids (i.e., cadalene, norpimerane, 19-norabietane, 19-Norabieta-8,11,13-triene, dehydroabietane, 10,18-bisnorabieta-5,7,9(10),11,13-pentaene, simo…
Sample Info				Diterpernoids and other biomarkers for gymnosperms							Triterpenoids (Angiosperms)
Section	Sample code	Depth from base	Lithology (from log)	Cadalene	Norpimarane	18-norabietane	19-Norabieta-8,11,13-triene	Dehydroabietane	10,18-bisnorabieta-5,7,9(10),11,13-pentaene	Simonellite	Tetramethyl-octahydrochrysene	Des-A-lupane		Additional information:
				MW 198	MW 262	MW 262	MW 256	MW 270	MW 238	MW 252	MW 292	MW 330
				m/z 183, 198, 168	m/z 233, 123	m/z 109, 191, 262	m/z 159, 241, 185	m/z 255, 159, 173	m/z 223,181,238	m/z 237,252,195	m/z 292,180,168	m/z 123,163,149,109			none
				RT 13.12	RT 18.03	RT 18.64	RT 19.09	RT 20.22	RT 20.7	RT 21.49	RT 27.68	RT 29.03		x	trace
Lvhe/Yunnan	Lv-340	340	0											xx	present
Lvhe/Yunnan	Lv-331.5	331.5	coal					x				x		xxx	abundant
Lvhe/Yunnan	Lv-325.5	325.5	clay/coal?		x	xx					x	x
Lvhe/Yunnan	Lv-314	314	coal
Lvhe/Yunnan	Lv-311	311	silty mudstone		x			xx		xx		xx
Lvhe/Yunnan	Lv-305	305	0
Lvhe/Yunnan	Lv-303.5	303.5	coal
Lvhe/Yunnan	Lv-301.9	301.9	silty mudstone	xxx	xx		x	xx		xx	x	xxx
Lvhe/Yunnan	Lv-289	289	silty mudstone				x	xxx		xxx	x	xxx
Lvhe/Yunnan	Lv-273.5	273.5	silty mudstone
Lvhe/Yunnan	Lv-268	268	silty mudstone	xxx	xx		x	xx	xx	xxx	xxx	xx
Lvhe/Yunnan	Lv-255	255	clay?					x
Lvhe/Yunnan	Lv-253.8	253.8	silty mudstone	x				xx		xxx	x
Lvhe/Yunnan	Lv-228.5	228.5	coal	xxx	x	x		xxx		xxx		x
Lvhe/Yunnan	Lv-224.1	224.1	coal/ash layer?	x	xxx	xxx		xxx		xxx	x
Lvhe/Yunnan	Lv-202	202	0	x			x	x		xx
Lvhe/Yunnan	Lv-201	201	coal									x
Lvhe/Yunnan	Lv-183.5	183.5	coal?
Lvhe/Yunnan	Lv-149	149	coal
Lvhe/Yunnan	Lv-146.7	146.7	coal
Lvhe/Yunnan	Lv-134.5	134.5	coal
Lvhe/Yunnan	Lv-129	129	coal					x				xxx
Lvhe/Yunnan	Lv-115	115	coal?									xxx
Lvhe/Yunnan	Lv-105.6	105.6	silty sandstone					x		x		xx
Lvhe/Yunnan	Lv-100.5	100.5	coal
Lvhe/Yunnan	Lv-96	96	coal			x						xxx
Lvhe/Yunnan	Lv-83	83	silty mudstone								x
Lvhe/Yunnan	Lv-73	73	silty mudstone								x	x
Lvhe/Yunnan	Lv-65	65	clay?	x	x	x		xxx		xxx	x	x
Lvhe/Yunnan	Lv-61	61	coal	x	x	x		xxx		xxx	x	x
Lvhe/Yunnan	Lv-58.5	58.5	coal		x	x		xxx		xxx
Lvhe/Yunnan	Lv-57.6	57.6	coal			x		xxx		xxx	x
Lvhe/Yunnan	Lv-53.2	53.2	coal	xx		x				x	x	x
Lvhe/Yunnan	Lv-50.5	50.5	silty sandstone					x				x
Lvhe/Yunnan	Lv-47.3	47.3	sand/silty mudstone	x				x		xx	xxx	xxx
Lvhe/Yunnan	Lv-46.5	46.5	silty mudstone	x	x			x		xx	xx	x
Lvhe/Yunnan	Lv-44.1	44.1	sand					x
Lvhe/Yunnan	Lv-40.7	40.7	0					x				xxx
Lvhe/Yunnan	Lv-31.7	31.7	silty mudstone					xx		xx	x
Lvhe/Yunnan	Lv-26.7	26.7	coal		xx
Lvhe/Yunnan	Lv-23.8	23.8	coal	x	xxx	xxx		xxx		xxx	xx
Lvhe/Yunnan	Lv-22.4	22.4	coal		xx	xx		xxx		xxx	xxx
Lvhe/Yunnan	Lv-21.4	21.4	coal		xxx	xxx	xxx	xxx	xxx	xxx	x
Lvhe/Yunnan	Lv-18.9	18.9	0						xx	xxx
Lvhe/Yunnan	Lv-18.10	18.1	0	x	xx	xxx	xxx	xxx			xxx
Lvhe/Yunnan	Lv-17.9	17.9	coal			x					x
Lvhe/Yunnan	Lv-15.9	15.9	silty mudstone			x
Lvhe/Yunnan	Lv-15	15	0
Lvhe/Yunnan	Lv-14.2	14.2	silty mudstone
Lvhe/Yunnan	Lv-13.3	13.3	silty mudstone									xxx
Lvhe/Yunnan	Lv-11.9	11.9	coal/sandy siltstone
Lvhe/Yunnan	Lv-11.7	11.7	coal
Lvhe/Yunnan	Lv-8.2	8.2	coal		xxx	xxx	xxx	xxx	x	xxx
Lvhe/Yunnan	Lv-6.7	6.7	sand		x				x	xx	xxx	xxx
Lvhe/Yunnan	Lv-6.5	6.5	sand
