# Supplementary material for: Dynamic environment but no temperature change since the late Paleogene at Lühe Basin (Yunnan, China)
Source: Copernicus journal article supplement (doi:10.5194/egusphere-2023-373), 2023-03-27
Supplement: Supplementary file [file egusphere-2023-373-AC3-supplement.pdf]

**Reply to reviewer comments 3 (RC3):**

In this manuscript, the authors investigated a 340-m long section in the Lühe Basin in Yunnan, China, located along the SE margin of the Tibetan Plateau. Based on analyses of organic geochemical proxies and model simulations, the authors reached several conclusions: (1) the sediments in the Lühe section were deposited in a highly variable and dynamic environment; (2) there was no significant temperature change (no cooling trend) at the study site between 35 Myr and 27 Myr; and (3) their reconstructed temperatures were similar to the present-day, suggesting that the study area has reached its present elevation since at least the early Oligocene. The topic of this study is interesting and important. The investigation of the sediments from the SE margin of the Tibetan Plateau could contribute to a better understanding of the complex tectonic and environmental history of the Plateau. However, there seem some major problems in the manuscript, which makes the conclusions (2) and (3) unconvincing.

**We thank the reviewer for their positive comments and their constructive feedback. We respond to each individual comment below in blue/bold text. Line numbers refer to the “track changes” version of the manuscript.**

In general, there is lack of discussion and information on the limitation and uncertainty of various temperature reconstructions used in this study. It is difficult to judge whether different reconstructions are comparable, whether the past and the present are comparable, and whether the conclusions are reliable. From some information given in the main text and Fig.6, it is difficult to conclude that there is no trend in temperature change over the study period.

**We added more descriptions of the uncertainties associated with each method (Line 465-470). We include the number of samples,  $r^2$  value, and associated uncertainty of each brGDGT calibration used throughout the methods (Lines 164, 169, 177, 182). When referring to mean averages within our descriptions of the dataset, we always include the standard deviation.**

**Throughout these comments, the reviewer asks whether the reconstructions are comparable. Indeed, these are all well-established methods that have been tested for decades, both separately and together, both against the modern and against past periods of established climate regimes; again and again, these methods (nearly always) converge on the same exact values, which confirms they are tracking the same climate signal. In our section, our four different methods all converge on similar values, adding to the extensive literature.**

**The different methods work together complementarily, each with its own strengths and limitations, which is why it is so important to use multiple approaches in paleo records. For example, brGDGTs and CLAMP have similar uncertainties (2.4°C and 2.3°C, respectively); however, brGDGTs provide much higher temporal resolution while CLAMP provides contextual information like precipitation and vapour pressure deficit. The data-based methods (e.g., brGDGTs and CLAMP) represent reality, recording actual temperatures from the site during that time period, as opposed to the models which are physics-based expectations; however, the models provide larger scale and contextual views of the region that are impossible to achieve with the proxies alone.**

Some model results are hard to understand (see specific comments below), so using the model results to support the GDGTs-estimated temperature is unconvincing.

**To improve the clarity of the climate model results, we have rewritten the entire climate model results (Section 3.5), added a table to show changes throughout the section (Table 2), and added a new figure to visualise the differences in orographic height in our modelling experiments (Fig. 5). We address each specific comment below.**

Given the many uncertainties and doubts detailed in my comments below, conclusions (2) and (3) are too strong. Moreover, regarding the elevation of the Tibetan Plateau, many other studies suggest that rapid elevation increase in SE Tibet had happened during the Miocene (e.g. Clark et al 2005, doi: 10.1130/G21265.1; Royden et al 2008, 10.1126/science.1155371), which contradicts the conclusion (3).

Although some previous studies have suggested rapid elevation during the Miocene for SE Tibet, they have since been superseded; many of these original basins that were previously reported as Miocene (based on floral assemblages) have now been radiometrically dated and confirmed as Eocene (e.g., Tang et al., 2020; Xu et al., 2023). This new and very large body of work demonstrates the rise of SE Tibet in the Eocene.

That said, this region is indeed complex, which is why the current study provides an important puzzle piece in characterising the heterogeneous rise of SE Tibet.

My specific comments and questions are listed below:

1. About proxy problems:

- Regarding temperature estimation from brGDGTs, to which extent could the global calibration be applied at the study site and for such an old time period, and what could be the uncertainty and limitation?

The proxy is based on a biological mechanism / function and global calibration datasets (outlined in Section 2.2.4 e.g., Weijers et al., 2007; De Jonge et al., 2014; Martinez-Sosa et al., 2021, and including members of our team e.g., Naafs et al., 2017) and is thus not dependent on location. This is a widely used proxy for temperature reconstructions across the Cenozoic (e.g., Weijers et al., 2007) that has been supported by its close replication of other deep-time temperature proxies throughout the literature (e.g., Hollis et al., 2019).

Within this current study, we see that the brGDGT temperatures are consistent with the temperatures reconstructed from two independent palaeobotany-based proxies (BA and CLAMP) as well as consistent with the climate model simulations. Together, these independent methods provide supporting evidence that these methods do indeed work and this study adds to the extensive literature on cross-proxy comparisons with brGDGTs.

- It is written that “the GDGTs in our section could have been produced in mineral soils, peats, or a shallow lake environment based on our environmental reconstructions”. Then what is the exact meaning of MAAT\_soil, MAAT\_peat and MAAT\_lake? They are assumed to reflect the temperature of the soil, peat and lake water where the GDGTs were produced, instead of air temperature. If the present-day MAAT and the simulated MAAT are air temperature, they would not be comparable with the GDGTs-based temperatures.

brGDGTs are calibrated against air temperature, which are closely related to mean annual temperatures from soil (De Jonge et al., 2014), mean annual temperatures from peat (Naafs et al., 2017), and months above freezing temperatures from lakes (Martinez-Sosa et al., 2021). These three calibrations are based on extensive studies in the literature, with detailed descriptions in Section 2.2.4.

- The authors conclude that “our observations indicate a dynamic but evolving fluvial-lacustrine environment throughout the entire section”. So to which extent the reconstructed temperature reflects in-situ temperature or temperature at remote source region is uncertain. The comparison with the present-day temperature at the study site is therefore questionable.

We agree with the reviewer that a dynamic environment could have provided allochthonous input which could bias (but unlikely to overwhelm) the in situ signal. We tested whether the temperature is impacted by changes to the mixture of in situ versus allochthonous brGDGTs by plotting MBT'5me against Paq and plotting MBT'5me against lithology (Line 360-365). There were no apparent trends. This suggests primarily in situ signals. Furthermore, our brGDGTs were only found in the low-energy clay and silt sediments (more likely to contain in situ signals); the high-energy sand sediments (more likely to contain allochthonous signals) were not conducive to brGDGT preservation (Line 390-400). In other words, our brGDGT temperature reconstructions mostly represent in situ conditions.

- Given the highly variable depositional environment at the study site, it is difficult to understand why only the lake-calibrated temperature is considered. Given the marked difference between the lower

(0-73 m) and upper part (73-340 m), should different calibration methods be used at least for the upper and lower parts? Could this affect the conclusion?

**We have used the lake calibration because the depositional environments are characterised as fluvial-lacustrine (a floodplain, with occasional submerged peat/swamp deposits and occasional high energy riverine input). All of these possible environments throughout the section (both upper and lower sections) are very wet and thus, the lake calibration is the most reasonable calibration to use (See detailed explanation in Lines 390-400).**

- I read from Fig.6 that the uncertainty of the lake MAF is ~8 degree C (shown by blue horizontal bars). Given such a large uncertainty, it is impossible to conclude whether there is a trend or not over the study period. Many studies cited in the paragraph of line 411 suggest a cooling across EOT of only a few degree C. If there was also a cooling trend of a few degree C at the study site, it could not be reflected in the GDGTs temperature reconstruction because of the large uncertainty and large variability.

**The uncertainty associated with the brGDGT lake calibration is actually  $\pm 2.4^{\circ}\text{C}$ ; we made a mistake by using a different calibration's  $\pm 4.0^{\circ}\text{C}$  which has now been corrected. We thank the reviewer for highlighting this issue.**

**But it is also important to note that this is the standard deviation of the calibration, meaning that the absolute estimated values are the most likely values in a normal distribution and that the likelihood of the temperature being e.g., +2C or -2C is much lower. Although this is a large range, this is considered well-constrained uncertainty for a paleo-proxy (e.g., Hollis et al., 2019). We also want to highlight recent work by members of our team on reconstructing temperature change across the EOT using brGDGTs (Lauretano et al., 2021).**

- The authors state that "The temperature trends throughout the section show variability, possibly due to mixing of in situ and allochthonous sources within the rapidly changing and dynamic depositional environment (line 382)". So the lack of temperature trend over the 8 Myr at the study site could be due to mixing and large variability but not really related to climate change.

**This is not likely, see our previous comment on in situ vs allochthonous sources.**

- As the brGDGT indices exhibit large variability throughout the section and the MAF\_lake has a range from 11.8 to 22.2°C, which covers a wide range of possible temperatures, considering only the mean temperature of 17.3°C in the comparison with the present-day temperature and the simulated one does not make sense.

**We include the full range, not just the average, to show readers that there is indeed variability over time. However, it is notable that there is no long-term cooling over the course of the section nor is there a stepwise cooling from the Eocene into the Oligocene, as seen across the marine-based records (and some terrestrial brGDGT based records). This lack of change from the globally warmhouse temperatures of the Eocene into the globally coolhouse temperatures of the Oligocene is certainly interesting and adds to the increasing literature that suggests a heterogeneous signal in the terrestrial realm across the EOT.**

- In Fig.6, there are only five points for peat brGDGT MAAT and no information on MAAT\_soil, so it is impossible to get trend information from these two reconstructions. The BA and CLAMP MAAT are only an averaged estimate for a thick portion (70-130m), so they can not indicate trend.

**All raw data is included in the Supplement. The five points for peat brGDGT were included because these five samples that have extremely high organic content and thus may have come from a peat-like depositional environment. The MAAT soil calibration was not used because there was no strong evidence for a soil-dominated depositional environment (see Section 3.3 on depositional environment reconstruction).**

The reviewer is correct that BA and CLAMP MAAT represent a single point (integrating 18m in the section) and do not indicate a trend. This highlights the benefit of using brGDGTs as these can highlight changes across a section.

## 2. About model results

- Line 400-402: It is difficult to understand that the simulated temperature at the study site is not sensitive to a large change of the Tibetan topography from 2.5-km valley to 4.5-km plateau. This shows that the temperature at the study site is not sensitive to the change of the Tibetan topography. Then it would not make sense to use the reconstructed or simulated temperature at the study site to indicate the Tibetan elevation.

We would not necessarily expect a large change in the climate signal simply because of the change in the configuration of Tibet from the proposed topographic sensitivity studies modelled here. This is because the dynamics and thermodynamics are not sensitive to large scale changes in Tibet for regions of the Hengduan, as long as there is high topography in the region already, in this case the Gangdese vs. a Plateau (both at 4.5km). The seminal work of Boos and Kuang (2010) show in the modern world, as long as you have a large topographic front (in this case the Himalaya, analogous to the Gangdese here) and not a Plateau, the monsoon in Asia does not significantly affect the advected South/South-west airmass flow and related temperature and precipitation patterns. Local changes in topography are more important to reconstruct elevation.

- Line 397: "In all model simulations, mean annual precipitation (MAP) increases between 150-200 mm/yr but does not significantly vary amongst different pCO<sub>2</sub> values nor topographic configurations.": It is difficult to understand that the large boundary condition changes have no significant influence on MAP. It means that in the model, the MAP in the Asian region is not sensitive to these condition changes. Then what could have caused the changes in hydrology and overall energy of the system in the study region (line 458-459).

We suggest that upstream changes are occurring (Line 500-505): "The complex tectonic changes that have been explored for sites farther upstream in Tibet likely contribute to the change we see in this section (e.g., Su et al., 2019a; 2019b; 2020; Spicer et al., 2020), which likely impacted precipitation. The increased fluvial influence then led to lateral channel migration and/or an increase in river size/energy spilling across the basin due to a change in catchment size or the amount of precipitation."

- The simulated CMMT is 12.1°C, and the CLAMP reconstructed CMMT is 4.5°C. Given such a big difference, which result is more reliable, the model or the CLAMP?

Each method has different strengths and limitations, which is why it is so valuable to use multiple approaches in paleo research. CLAMP is based on fossil assemblages that integrates traits from dozens of species; as a data approach, it is generally more reliable but only for the limited location and time where the data was collected. The model provides powerful largescale spatial and temporal context but lacks the resolution on the basin scale. In Su et al. (2019), we look at the model latitudinal results versus CLAMP, and find a strong regression line between the two.

- Line 390: What is the purpose to analyze the results for such a broad Asian region? Its relevance for the current study is unclear. In Table 1, it would be more relevant to show the model results for the Lühe basin instead of the very broad Asian region.

We have revised Table 2 to focus exclusively on the Lühe Basin site. We have left Table 1 on the regional results, as these are critical for contextualising the site.

- Line 186-189: It would be helpful to show a figure with the present-day climate simulation for the Lühe basin and the comparison with observation.

A present-day climate simulation for the Lühe Basin would simply look like the real present-day Lühe Basin. Valdes et al. (2017) shows a comparison of the HadCM3 model to other models, including the models that only focus on the modern. HadCM3 consistently does among the best. Furthermore, Sperber, et al. (2013) shows the CMIP5 monsoon statistics for Asia between all the models; again, HadCM3 is one of the top models.

- Line 190: It would be helpful to show the boundary conditions on the model resolution to show to which extent the model could resolve the regional orography condition at the Lühe basin and the SE Tibetan Plateau region.

All model boundary conditions are included in Supplement Table S4 and S5.

- It would be helpful to give more explanation on experiment setup and provide significance test for the simulated changes of temperature and precipitation. What does it mean "valley, plateau, v-to-PI", please give more information and illustrate with figures.

We added a figure (Fig. 5) to demonstrate the different between the valley (2.5km) and plateau (4.5km).

We specified this more clearly throughout the section. See section 2.2.5, "Topographic changes were also considered across the Priabonian to Rupelian based on hypotheses posed by Spicer et al., 2020 (and references therein), either as a) a constant valley at 2.5 km elevation, b) a constant plateau at 4.5 km elevation, or c) a change from a valley at 2.5 km to a plateau at 4.5 km."

We added some guiding text in the caption in Table 1, "Tibetan topography is configured at different elevations to determine the impacts this may have on the broader climate system, here showing as only a valley at 2.5 km, as only a plateau at 4.5 km, or as a change from valley to plateau from 2.5 to 4.5 km."

3. About temperature response to CO<sub>2</sub> decrease:

The CO<sub>2</sub> concentration decreased from 1120 ppm for the Priabonian to 560 ppm for the Rupelian, and the model simulates a cooling of ~6°C for the broad Asian region (Table 1) in response to the CO<sub>2</sub> decrease. However, based on the GDGTs reconstructed temperature, the authors conclude that there was no significant temperature change (no cooling trend) over the 8Myr period at the study site. It is difficult to understand that such a large CO<sub>2</sub> decrease has no significant impact on the temperature at the Lühe basin. With a high elevation, the temperature of this region would be more sensitive to the large CO<sub>2</sub> decrease than low-elevated region. Does the model simulate a cooling at the Lühe basin in response to the large CO<sub>2</sub> decrease?

Although there was a CO<sub>2</sub> change worldwide and thus can have an impact on temperature worldwide (and on average for the broad Asian region), CO<sub>2</sub> is not the only factor that impacts local temperature. Indeed, there appears to be global heterogeneity of terrestrial temperature records during the Eocene-Oligocene transition, as we outline in Section 3.6. For example, impacts may include localised albedo (e.g., based on soil type), vegetation type and associated impacts (e.g., transpiration and canopy cover (Fritz et al., 1961)), localised nutrient and carbon cycling, and detailed differences in topography (e.g., even as detailed as whether the site represents the north or south slope of a valley). This detailed local resolution is not possible with the resolution of the models.

Other comments:

- As the sediments at the Lühe coalmine section were deposited in a highly dynamic and variable environment that fluctuated between low energy floodplains and high energy fluvial systems, it would be important to prove the continuity of the deposition in the section.

We have the age framework in our figures, which considers sedimentation, time series analysis, astronomical tuning, and the Ar/Ar dating (Li et al., 2020 updated for Speijer et al.,

2020). While this paper has been in review, another paper has come out to further confirm this through a cyclostratigraphic framework for deposition in the basin (Xu et al., 2023).

- Line 435: What would be the local factors?

[See our previous comment on influences of local factors.](#)
