# Supplementary figures and images for: Dynamic environment but no temperature change since the late Paleogene at Lühe Basin (Yunnan, China)
Source: Copernicus journal article supplement (doi:10.5194/egusphere-2023-373), 2023-03-27

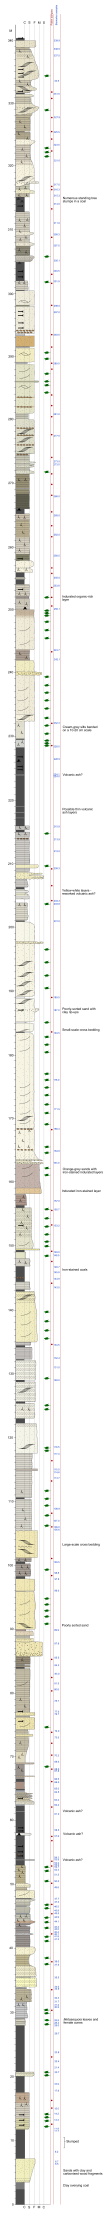

Supplement: Supplementary file 1 [file egusphere-2023-373-supplement.zip]
